# Supplementary material for: Highly active mesoporous chromium silicate catalysts in side-chain oxidation of alkylaromatics
Source: Royal Society of Chemistry journal article supplement (doi:10.1039/c2dt31571h), 2012-01-01
Supplement: c2dt31571h.pdf [file c2dt31571h.pdf]

## **Supporting information**

**Table 1S** Structural and textural parameters of calcined CrSBA-15 catalysts

| Catalysts                 | $n_{\text{H}_2\text{O}}/n_{\text{HCl}}$<br>(molar ratio) | $n_{\text{Si}}/n_{\text{Cr}}$ |                      | $a_0$<br>(Å) | $A_{\text{BET}}$<br>(m <sup>2</sup> /g) | $V_p$<br>(cm <sup>3</sup> /g) | $d_p$<br>(Å) | $T_w = a_0 - d_p$<br>(Å) |
|---------------------------|----------------------------------------------------------|-------------------------------|----------------------|--------------|-----------------------------------------|-------------------------------|--------------|--------------------------|
|                           |                                                          | Gel                           | Product <sup>a</sup> |              |                                         |                               |              |                          |
| SiSBA-15                  | 40                                                       | -                             | -                    | 118.2        | 908                                     | 1.07                          | 87.4         | 30.3                     |
| CrSBA-15(8)               | 295                                                      | 8                             | 9.9                  | 127.4        | 999                                     | 1.10                          | 89.4         | 38.0                     |
| CrSBA-15(16)              | 295                                                      | 16                            | 17.3                 | 122.7        | 1015                                    | 1.09                          | 88.5         | 34.2                     |
| CrSBA-15(20)              | 295                                                      | 20                            | 45.0                 | 121.3        | 1024                                    | 1.08                          | 87.3         | 34.0                     |
| CrSBA-15(50)              | 295                                                      | 50                            | 99.8                 | 114.5        | 1063                                    | 1.09                          | 86.5         | 28.0                     |
| CrSBA-15(8) <sup>b</sup>  | -                                                        | -                             | 12.3                 | 127.3        | 985                                     | 1.10                          | 89.4         | 37.9                     |
| CrSBA-15(8) <sup>c</sup>  | -                                                        | -                             | 12.2                 | 127.2        | 982                                     | 1.10                          | 89.4         | 37.8                     |
| CrMCM-41(40) <sup>d</sup> | -                                                        | 40                            | 45                   | 44.4         | 883                                     | 0.70                          | 26.9         | 17.5                     |

<sup>a</sup>  $n_{\text{Si}}/n_{\text{Cr}}$  ratios of products are determined by ICP-AES.

<sup>b</sup> Washed catalyst.

<sup>c</sup> The catalyst was used in 4<sup>th</sup> run.

<sup>d</sup> The catalyst was synthesized under basic direct hydrothermal method.

$a_0$ , unit cell parameter;  $A_{\text{BET}}$ , Specific surface area;  $V_p$ , pore volume;  $d_p$ , pore diameter,  $T_w$ , wall thickness.

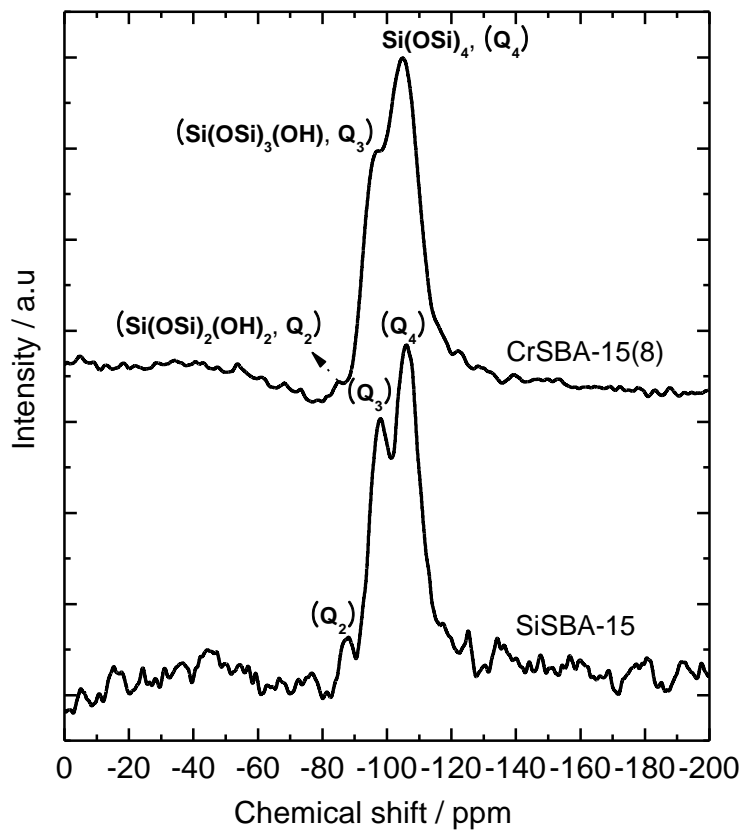

**Figure 1S.**  $^{29}\text{Si}$  MAS NMR spectra of calcined CrSBA-15(8) and SiSBA-15

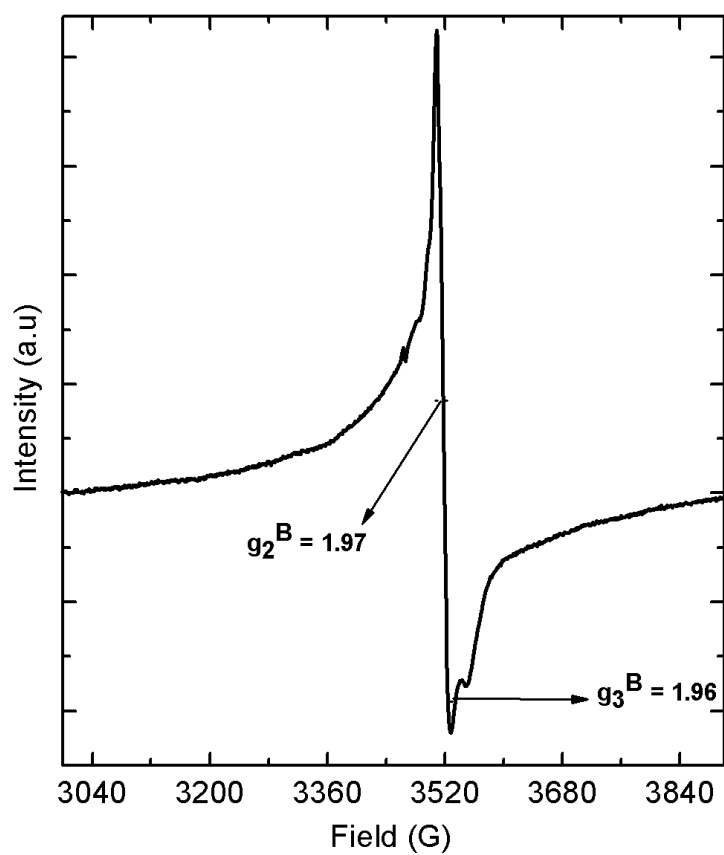

**Figure 2S.** ESR spectrum of calcined CrSBA-15(8)

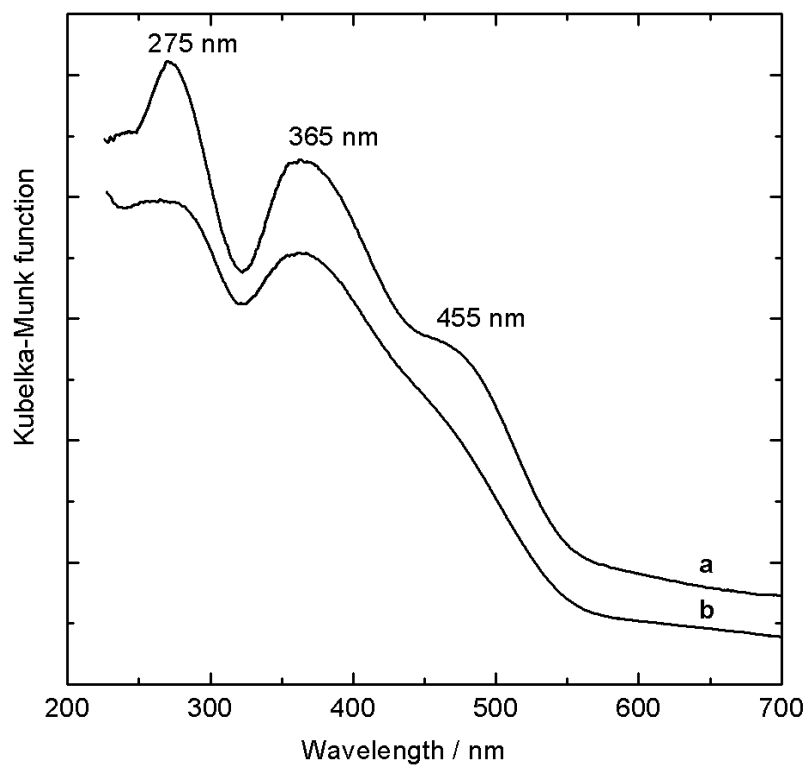

**Figure 3S:** UV-vis DR spectra of (a) calcined CrSBA-15(8) and (b) washed CrSBA-15(8)

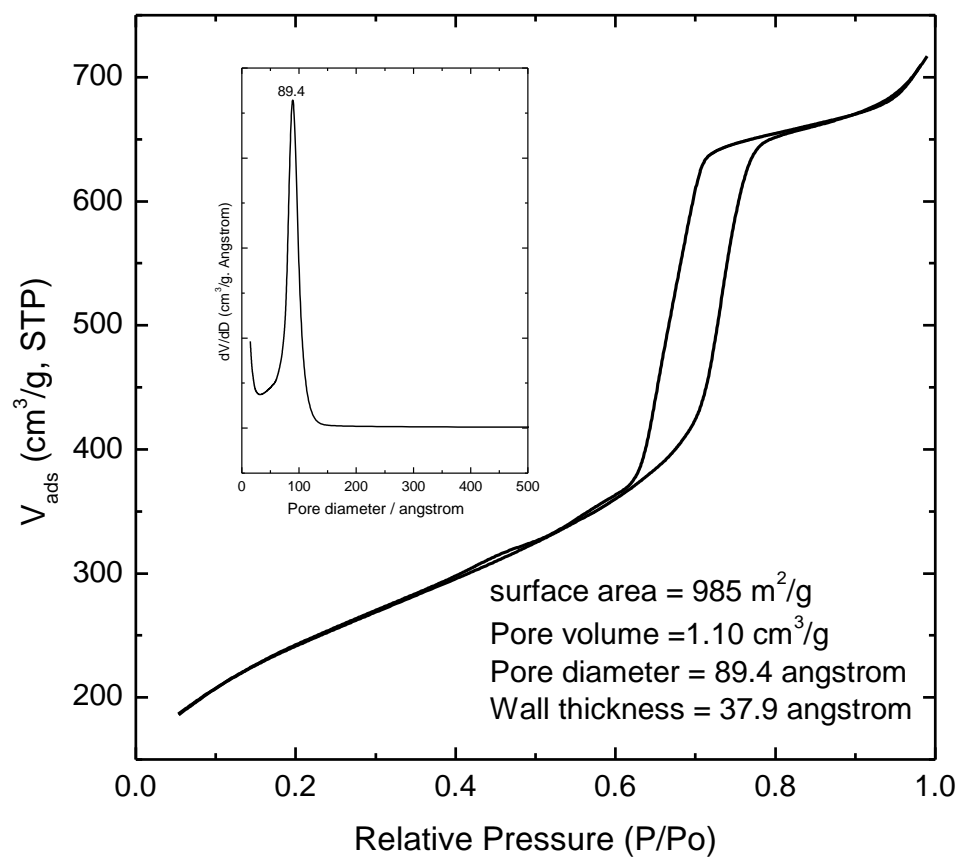

**Figure 4S** Nitrogen adsorption isotherms of Washed CrSBA-15(8)
